# Supplementary material for: The Anti-Inflammatory Effects of Shinbaro3 Is Mediated by Downregulation of the TLR4 Signalling Pathway in LPS-Stimulated RAW 264.7 Macrophages
Source: Hindawi journal article supplement (doi:10.1155/2018/4514329), 2018-01-01

## Supplementary materials

### Supplementary 1

#### Supplemental Figure 1

: All western blots were assessed of their quantified density.

**Figure 3 (c)**

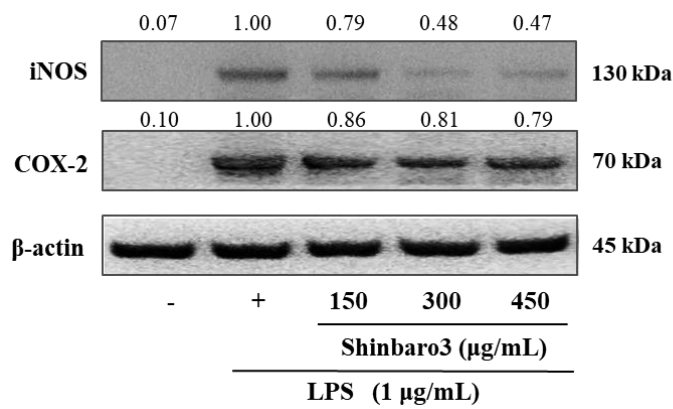

|     | iNOS    | COX-2   | beta-actin |  | iNOS        | COX-2       |
|-----|---------|---------|------------|--|-------------|-------------|
| -   | 870.0   | 3165.3  | 22493.9    |  | <b>0.07</b> | <b>0.10</b> |
| +   | 12194.4 | 32023.1 | 22605.4    |  | <b>1.00</b> | <b>1.00</b> |
| 150 | 9089.0  | 25998.4 | 21264.0    |  | <b>0.79</b> | <b>0.86</b> |
| 300 | 5485.8  | 23954.9 | 21005.4    |  | <b>0.48</b> | <b>0.81</b> |
| 450 | 5416.6  | 23810.8 | 21264.0    |  | <b>0.47</b> | <b>0.79</b> |

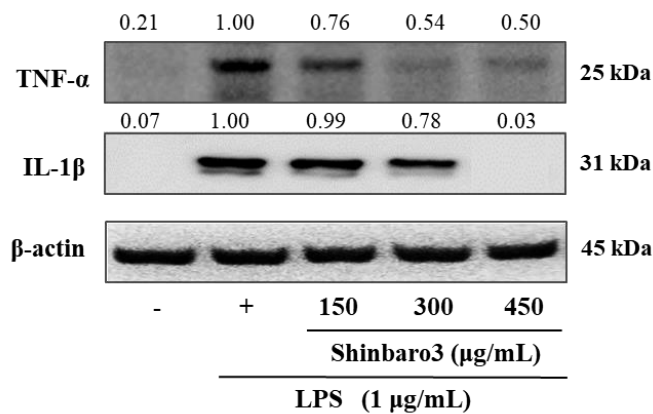

|     | TNF-a   | IL-1b   | beta-actin |  | TNF-a       | IL-1b       |
|-----|---------|---------|------------|--|-------------|-------------|
| -   | 5350.2  | 1906.7  | 33278.6    |  | <b>0.21</b> | <b>0.07</b> |
| +   | 26409.9 | 30548.7 | 35221.4    |  | <b>1.00</b> | <b>1.00</b> |
| 150 | 19103.1 | 28814.4 | 33477.6    |  | <b>0.76</b> | <b>0.99</b> |
| 300 | 13552.5 | 22405.3 | 33247.9    |  | <b>0.54</b> | <b>0.78</b> |
| 450 | 12262.9 | 940.0   | 32477.6    |  | <b>0.50</b> | <b>0.03</b> |

**Figure 3 (c):** Effects of Shinbaro3 on the expression of inflammatory mediators in LPS-stimulated RAW 264.7 macrophage cells. (Figure 3c) RAW 264.7 cells were treated with LPS (1 µg/mL) and Shinbaro3 (150, 300, and 450 µg/mL) for 18 h to investigate protein expression. iNOS, COX-2, TNF-α and IL-1β mRNA and protein expression levels were then analysed in Western blot assays. β-actin was used as an internal control. The data are representative of three separate experiments.

**Figure 4 (a)**

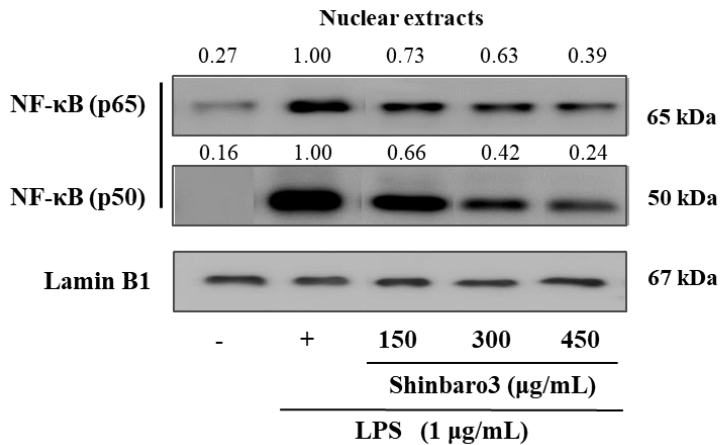

|     | p65     | p50     | beta-actin |  | p65         | p50         |
|-----|---------|---------|------------|--|-------------|-------------|
| -   | 9196.0  | 6789.9  | 25192.2    |  | <b>0.27</b> | <b>0.16</b> |
| +   | 27881.4 | 34791.6 | 20777.9    |  | <b>1.00</b> | <b>1.00</b> |
| 150 | 22012.7 | 24970.5 | 22566.6    |  | <b>0.73</b> | <b>0.66</b> |
| 300 | 18011.3 | 14786.2 | 21224.4    |  | <b>0.63</b> | <b>0.42</b> |
| 450 | 13658.2 | 10579.4 | 26105.7    |  | <b>0.39</b> | <b>0.24</b> |

**Figure 4 (b)**

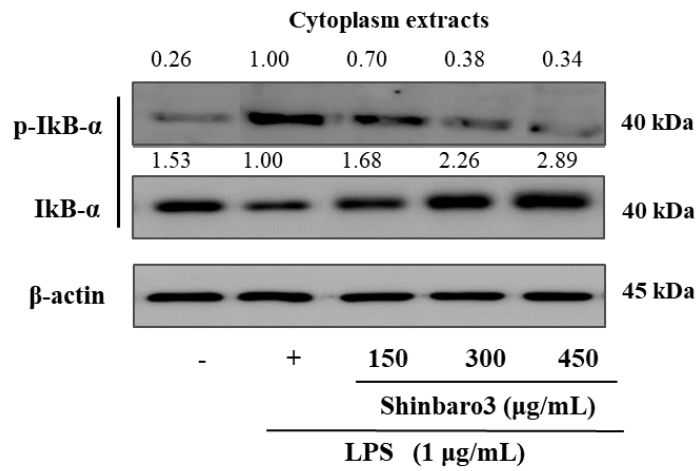

|     | p-IkB   | IkB     | beta-actin |  | p-IkB       | IkB         |
|-----|---------|---------|------------|--|-------------|-------------|
| -   | 8217.9  | 19862.3 | 30644.2    |  | <b>0.26</b> | <b>1.53</b> |
| +   | 31103.5 | 12815.2 | 30306.8    |  | <b>1.00</b> | <b>1.00</b> |
| 150 | 19830.7 | 19439.8 | 27441.6    |  | <b>0.70</b> | <b>1.68</b> |
| 300 | 10417.9 | 25388.5 | 26582.4    |  | <b>0.38</b> | <b>2.26</b> |
| 450 | 9376.5  | 32768.6 | 26808.4    |  | <b>0.34</b> | <b>2.89</b> |

**Figure 4 (c)**

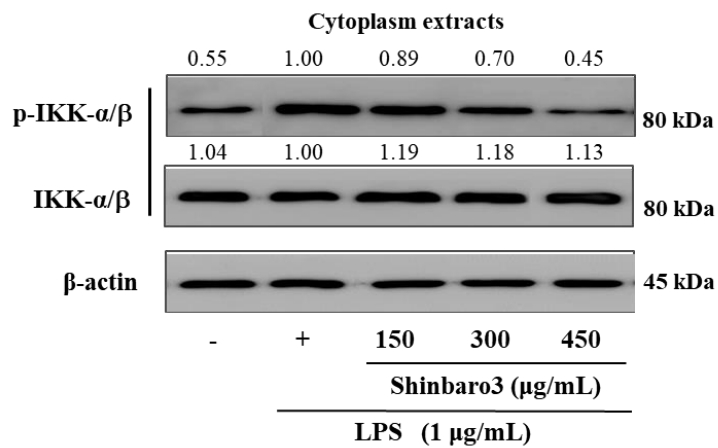

|     | p-IKK   | IKK     | beta-actin |  | p-IKK       | IKK         |
|-----|---------|---------|------------|--|-------------|-------------|
| -   | 20344.7 | 29100.9 | 30644.2    |  | <b>0.55</b> | <b>1.04</b> |
| +   | 36741.6 | 27701.1 | 30306.8    |  | <b>1.00</b> | <b>1.00</b> |
| 150 | 29723.1 | 29823.2 | 27441.6    |  | <b>0.89</b> | <b>1.19</b> |
| 300 | 22710.6 | 28694.5 | 26582.4    |  | <b>0.70</b> | <b>1.18</b> |
| 450 | 14476.0 | 27680.1 | 26808.4    |  | <b>0.45</b> | <b>1.13</b> |

**Figure 4:** Effects of Shinbaro3 on NF- $\kappa$ B activation in LPS-stimulated RAW 264.7 cells. RAW 264.7 cells were treated with LPS (1  $\mu$ g/mL) and Shinbaro3 (150, 300, and 450  $\mu$ g/mL) for 2 h to investigate protein expression. Nuclear and cytoplasm extracts were analysed via Western blotting. (Figure 4a, 4b, 4c) The expression levels of NF- $\kappa$ B (p65 and p50 subunits) (nuclear fraction), p-I $\kappa$ B- $\alpha$ , I $\kappa$ B- $\alpha$ , p-IKK- $\alpha$ , and IKK- $\alpha$  (cytoplasmic fraction) were measured using specific antibodies. Lamin B1 (nuclear fraction) and  $\beta$ -actin (cytoplasmic fraction) were used as an internal control. The data are representative of three separate experiments.

**Figure 5**

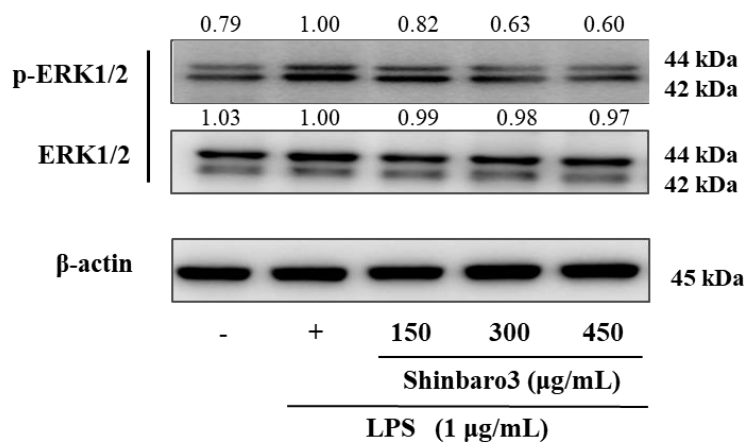

|     | p-ERK   | ERK      | beta-actin |  | p-ERK       | ERK         |
|-----|---------|----------|------------|--|-------------|-------------|
| -   | 22718.3 | 271426.7 | 26719.3    |  | <b>0.79</b> | <b>1.03</b> |
| +   | 32302.7 | 296485.4 | 29976.4    |  | <b>1.00</b> | <b>1.00</b> |
| 150 | 25646.6 | 285785.6 | 29145.9    |  | <b>0.82</b> | <b>0.99</b> |
| 300 | 22937.5 | 324473.6 | 33525.6    |  | <b>0.63</b> | <b>0.98</b> |
| 450 | 20769.0 | 307585.9 | 31918.0    |  | <b>0.60</b> | <b>0.97</b> |

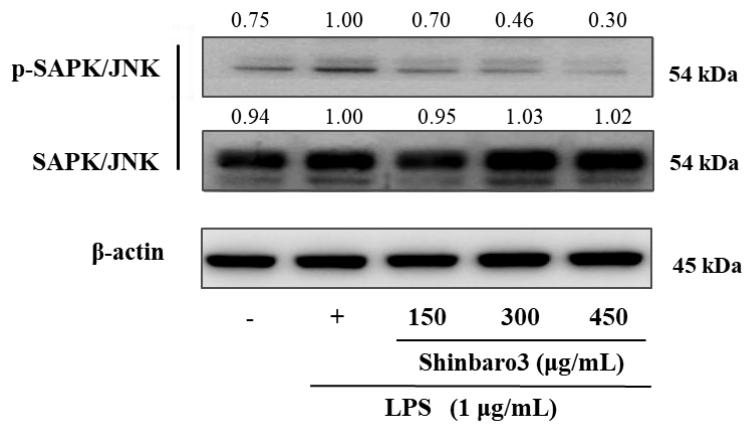

|     | p-JNK   | JNK     | beta-actin |  | p-JNK       | JNK         |
|-----|---------|---------|------------|--|-------------|-------------|
| -   | 19955.8 | 24196.3 | 26719.3    |  | <b>0.75</b> | <b>0.94</b> |
| +   | 29983.6 | 28837.4 | 29976.4    |  | <b>1.00</b> | <b>1.00</b> |
| 150 | 20463.8 | 26685.5 | 29145.9    |  | <b>0.70</b> | <b>0.95</b> |
| 300 | 15373.8 | 33137.2 | 33525.6    |  | <b>0.46</b> | <b>1.03</b> |
| 450 | 9689.2  | 31453.2 | 31918.0    |  | <b>0.30</b> | <b>1.02</b> |

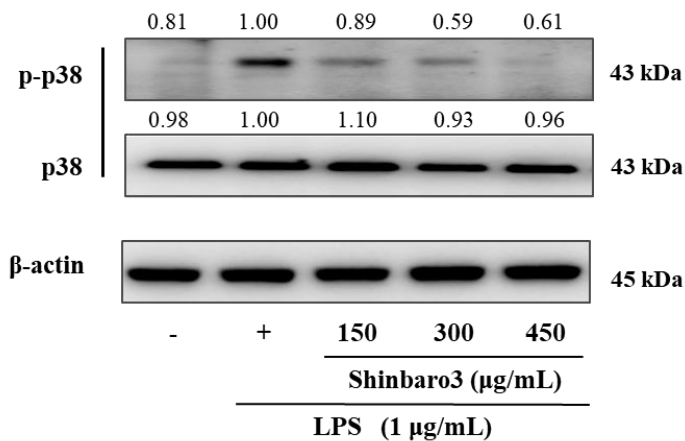

|     | p-p38   | p38     | beta-actin |  | p-p38       | p38         |
|-----|---------|---------|------------|--|-------------|-------------|
| -   | 18867.1 | 27028.4 | 26719.3    |  | <b>0.81</b> | <b>0.98</b> |
| +   | 26113.8 | 30970.2 | 29976.4    |  | <b>1.00</b> | <b>1.00</b> |
| 150 | 22651.9 | 33125.2 | 29145.9    |  | <b>0.89</b> | <b>1.10</b> |
| 300 | 17183.4 | 32096.8 | 33525.6    |  | <b>0.59</b> | <b>0.93</b> |
| 450 | 16853.9 | 31696.8 | 31918.0    |  | <b>0.61</b> | <b>0.96</b> |

**Figure 5:** Effects of Shinbaro3 on MAPK phosphorylation in LPS-stimulated RAW 264.7 cells. RAW 264.7 cells were treated with LPS (1 µg/mL) and Shinbaro3 (150, 300, and 450 µg/mL) for 2 h. Total cell lysates were analysed via Western blotting using anti-phospho-

ERK1/2, anti-phospho-SAPK/JNK, and anti-phospho-p38 antibodies.  $\beta$ -actin was used as an internal control. The data are representative of three separate experiments.

**Figure 6 (a)**

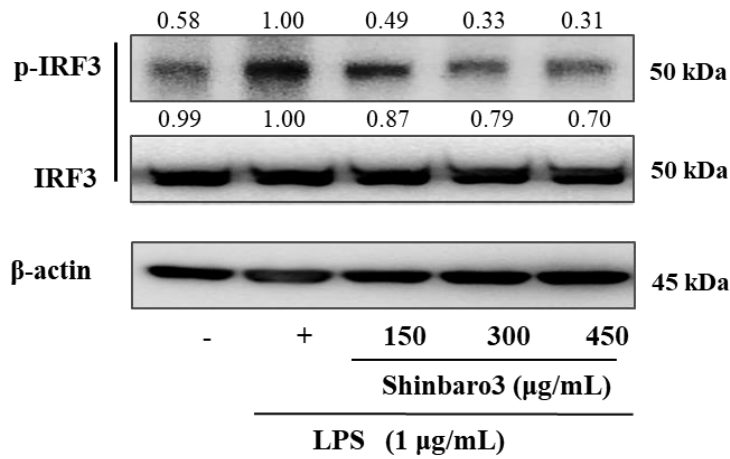

|     | p-IRF3  | IRF3    | beta-actin |  | p-IRF3      | IRF3        |
|-----|---------|---------|------------|--|-------------|-------------|
| -   | 15196.2 | 30895.9 | 23346.8    |  | <b>0.58</b> | <b>0.99</b> |
| +   | 27062.7 | 32466.5 | 24294.2    |  | <b>1.00</b> | <b>1.00</b> |
| 150 | 15060.0 | 32232.9 | 27657.0    |  | <b>0.49</b> | <b>0.87</b> |
| 300 | 10943.1 | 30998.1 | 29494.5    |  | <b>0.33</b> | <b>0.79</b> |
| 450 | 10612.6 | 28391.4 | 30402.1    |  | <b>0.31</b> | <b>0.70</b> |

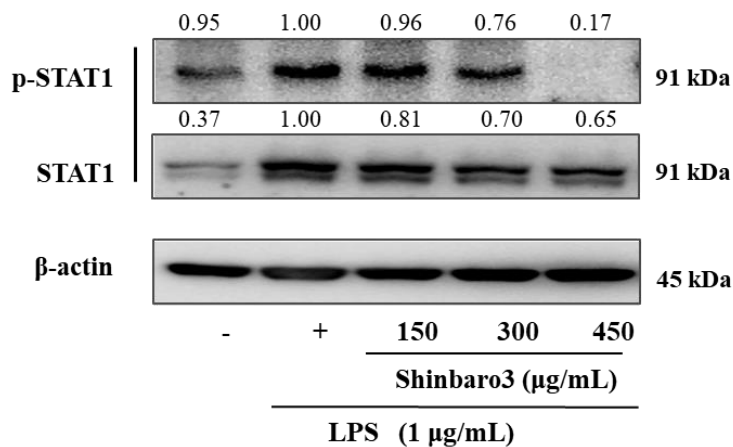

|     | p-STAT1 | STAT1   | beta-actin | p-STAT1     | STAT1       |
|-----|---------|---------|------------|-------------|-------------|
| -   | 23289.3 | 12242.0 | 23346.8    | <b>0.95</b> | <b>0.37</b> |
| +   | 25496.2 | 34478.0 | 24294.2    | <b>1.00</b> | <b>1.00</b> |
| 150 | 27835.5 | 31865.5 | 27657.0    | <b>0.96</b> | <b>0.81</b> |
| 300 | 23523.5 | 29254.8 | 29494.5    | <b>0.76</b> | <b>0.70</b> |
| 450 | 5375.7  | 28110.3 | 30402.1    | <b>0.17</b> | <b>0.65</b> |

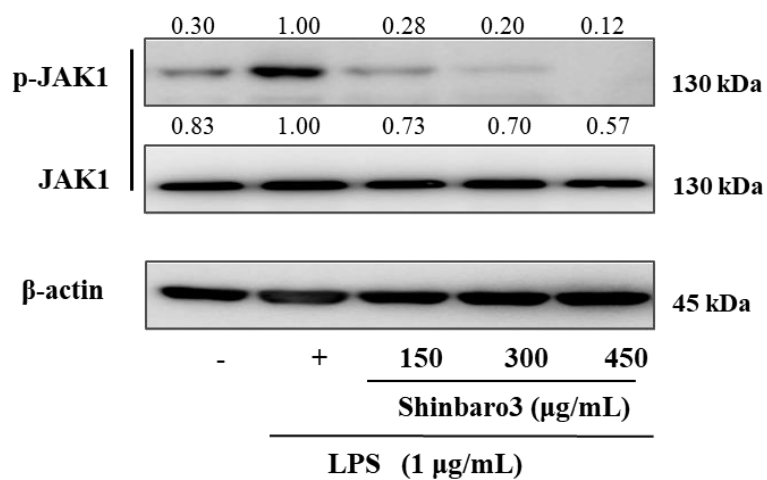

|     | p-JAK1  | JAK1    | beta-actin | p-JAK1      | JAK1        |
|-----|---------|---------|------------|-------------|-------------|
| -   | 8203.8  | 30045.2 | 23346.8    | <b>0.30</b> | <b>0.83</b> |
| +   | 28300.9 | 37758.2 | 24294.2    | <b>1.00</b> | <b>1.00</b> |
| 150 | 8873.5  | 31392.7 | 27657.0    | <b>0.28</b> | <b>0.73</b> |
| 300 | 6728.6  | 32296.4 | 29494.5    | <b>0.20</b> | <b>0.70</b> |
| 450 | 4418.8  | 26883.8 | 30402.1    | <b>0.12</b> | <b>0.57</b> |

**Figure 6 (b)**

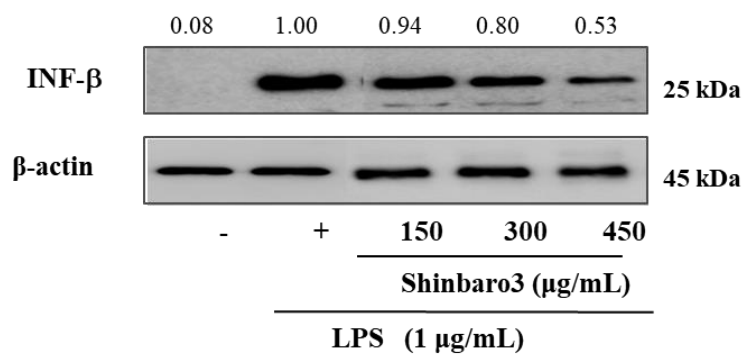

|     | INF-b   |  | beta-actin | INF-b       |
|-----|---------|--|------------|-------------|
| -   | 2302.3  |  | 25028.3    | <b>0.08</b> |
| +   | 33474.1 |  | 28768.0    | <b>1.00</b> |
| 150 | 31509.6 |  | 28664.0    | <b>0.94</b> |
| 300 | 25480.4 |  | 27248.0    | <b>0.80</b> |
| 450 | 15315.9 |  | 24985.9    | <b>0.53</b> |

**Figure 6 (d)**

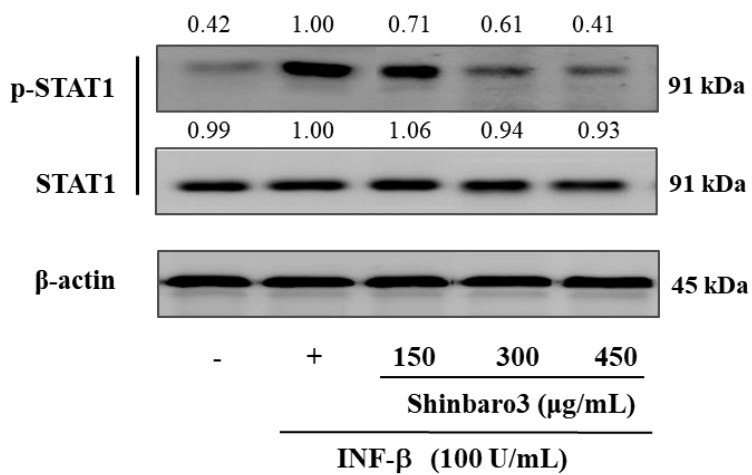

|     | p-STAT1 | STAT1   | beta-actin | p-STAT1     | STAT1       |
|-----|---------|---------|------------|-------------|-------------|
| -   | 12757.3 | 26469.0 | 32263.4    | <b>0.42</b> | <b>0.99</b> |
| +   | 30963.1 | 27069.0 | 32527.1    | <b>1.00</b> | <b>1.00</b> |
| 150 | 21267.7 | 27669.5 | 31384.2    | <b>0.71</b> | <b>1.06</b> |
| 300 | 18860.8 | 25499.8 | 32665.1    | <b>0.61</b> | <b>0.94</b> |
| 450 | 12907.6 | 25781.5 | 33377.2    | <b>0.41</b> | <b>0.93</b> |

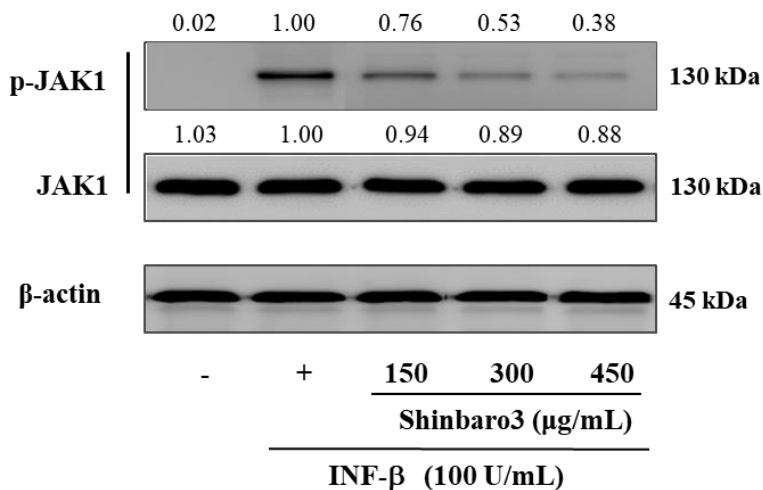



|     | p-JAK1  | JAK1    | beta-actin | p-JAK1      | JAK1        |
|-----|---------|---------|------------|-------------|-------------|
| -   | 620.2   | 32534.3 | 32263.4    | <b>0.02</b> | <b>1.03</b> |
| +   | 31462.5 | 31994.3 | 32527.1    | <b>1.00</b> | <b>1.00</b> |
| 150 | 23101.2 | 29128.9 | 31384.2    | <b>0.76</b> | <b>0.94</b> |
| 300 | 16621.3 | 28609.0 | 32665.1    | <b>0.53</b> | <b>0.89</b> |
| 450 | 12197.9 | 28819.2 | 33377.2    | <b>0.38</b> | <b>0.88</b> |

**Figure 6:** Effects of Shinbaro3 on the IRF3/STAT1 signalling pathway in LPS-stimulated RAW 264.7 cells. RAW 264.7 cells were treated with LPS (1  $\mu\text{g}/\text{mL}$ ) and Shinbaro3 (150, 300, and 450  $\mu\text{g}/\text{mL}$ ) for 4 h. The expression levels of (a) IRF3, STAT1, JAK1 and their phosphorylated forms were detected with specific antibodies. (b) Protein expression of INF- $\beta$  was assessed in RAW 264.7 cells under the above condition. (d) RAW 264.7 cells were stimulated with Shinbaro3 (150, 300, and 450  $\mu\text{g}/\text{mL}$ ) in presence of IFN- $\beta$  (100 U/mL) for 4 h. Protein expression of JAK1 and STAT1, and their phosphorylated forms were detected.  $\beta$ -actin was used as an internal control. The data are representative of three separate experiments.

**Figure 7 (a)**

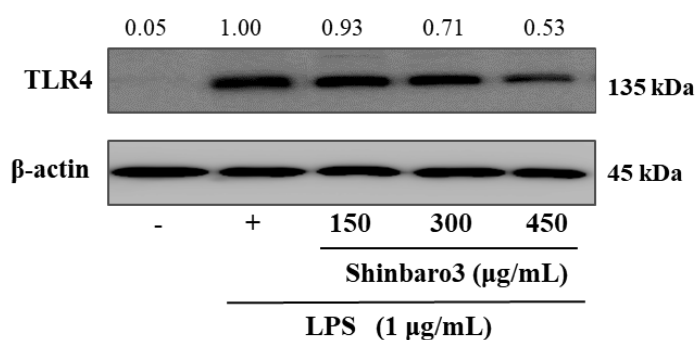

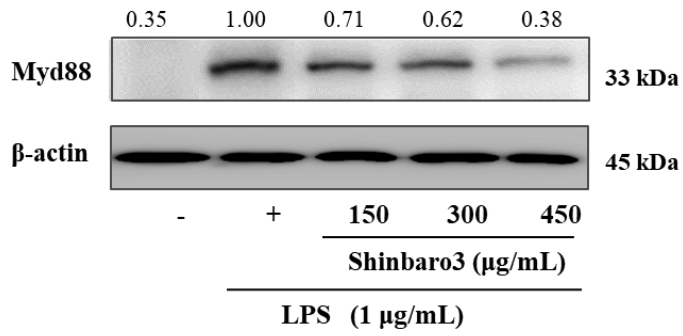

|     | TLR4    | Myd88   | beta-actin | TLR4        | Myd88       |
|-----|---------|---------|------------|-------------|-------------|
| -   | 2221.9  | 13480.9 | 36984.5    | <b>0.05</b> | <b>0.35</b> |
| +   | 35266.5 | 33485.4 | 31935.5    | <b>1.00</b> | <b>1.00</b> |
| 150 | 30754.8 | 22165.9 | 29808.6    | <b>0.93</b> | <b>0.71</b> |
| 300 | 25596.2 | 21163.5 | 32687.5    | <b>0.71</b> | <b>0.62</b> |
| 450 | 14788.3 | 10016.5 | 25294.7    | <b>0.53</b> | <b>0.38</b> |

**Figure 7:** Effects of Shinbaro3 on the TLR4/Myd88 signalling pathway in LPS-stimulated RAW 264.7 cells. RAW 264.7 cells were treated with LPS (1 µg/mL) and Shinbaro3 (150, 300, and 450 µg/mL) for 6 h. (a) TLR4 and (c) Myd88 protein expression levels were analysed via Western blotting. β-actin was used as an internal control. The data are representative of three separate experiments.

## Supplementary materials

### Supplementary 2

#### Supplemental Figure 2

: Shinbaro3 did not show any significant cytotoxicity in RAW 264.7 cells at 6, 12, and 24 h exposure. Cell viability upon Shinbaro3 or *H. procumbens* treatment for 6, 12, and 24 h were evaluated using the MTT assay, as described in the Materials and Methods. Data are presented as the mean  $\pm$  SD (n=3).

#### MTT assay (6, 12, 24 h)

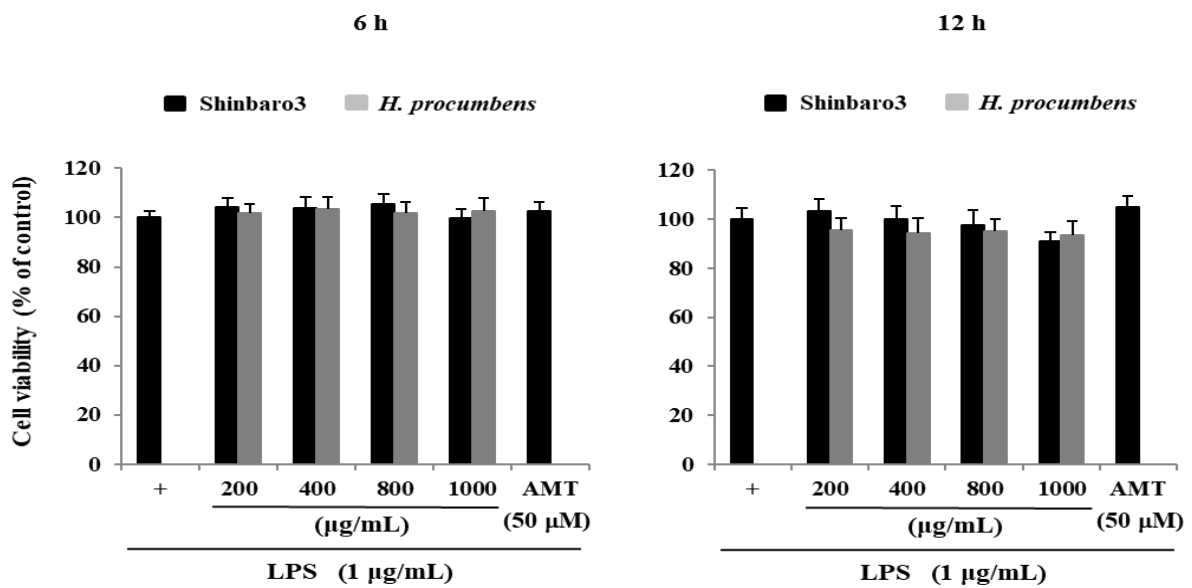

24 h

■ Shinbaro3    ■ *H. procumbens*

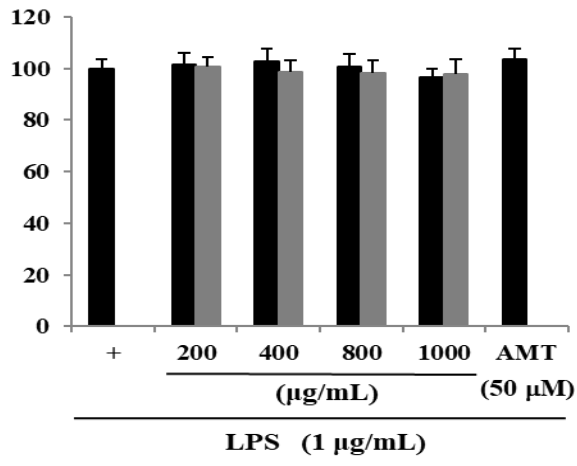

## Supplementary materials

### Supplementary 3

#### Supplemental Figure 3

: NO generation and cell viability has been found to be superior to equivalent amount of harpagoside, harpagide, or cinnamic acid in LPS-stimulated RAW 264.7 macrophage cells. (a) RAW 264.7 cells were stimulated with LPS (1  $\mu\text{g}/\text{mL}$ ) for 20 h in the absence or presence of harpagoside, harpagide, or cinnamic acid (200, 400, 800 or 1000  $\mu\text{g}/\text{mL}$ ). The nitrite concentration in the supernatant was detected via the Griess reaction. (b) Cell viability upon harpagoside, harpagide, or cinnamic acid treatment for 20 h was evaluated using the MTT assay, as described in the Materials and Methods. Data are presented as the mean  $\pm$  SD (n=3).

#### (a) NO production (harpagoside, harpagide, cinnamic acid)

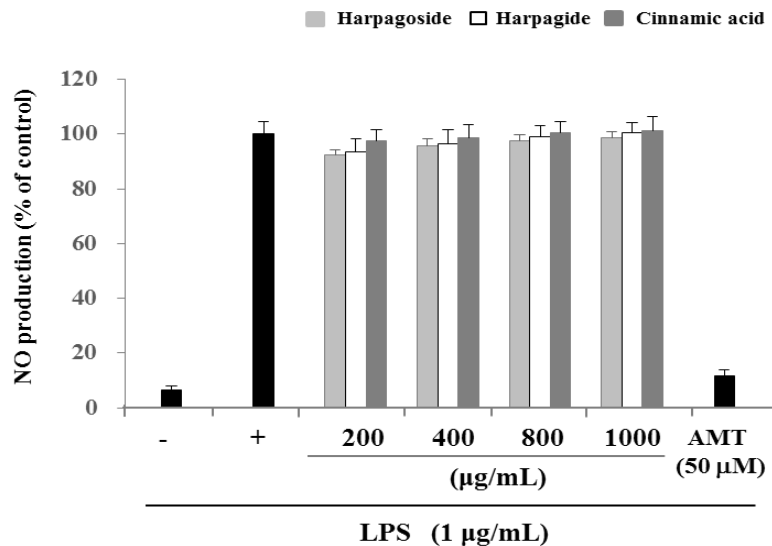

**(b) MTT assay (harpagoside, harpagide, cinnamic acid)**

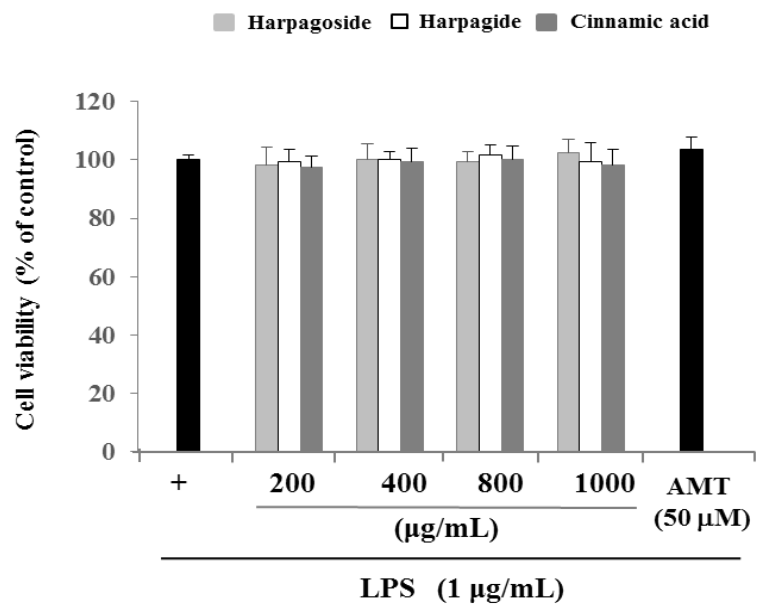

Supplement: f1 [file 4514329.f1.pdf]
